# Supplementary material for: A new 8-connected porous coordination polymer: crystal structure and selective adsorption properties
Source: Royal Society of Chemistry journal article supplement (doi:10.1039/c1ce05103b), 2011-01-01
Supplement: c1ce05103b.pdf [file c1ce05103b.pdf]

Electro Supporting Information (ESI)

# A new 8-connected porous coordination polymer with crystal structure and selectivity adsorption properties†

Hua-Hong Zou,\* Yan-Ping He, Liu-Cheng Gui, Fu-Pei Liang\*

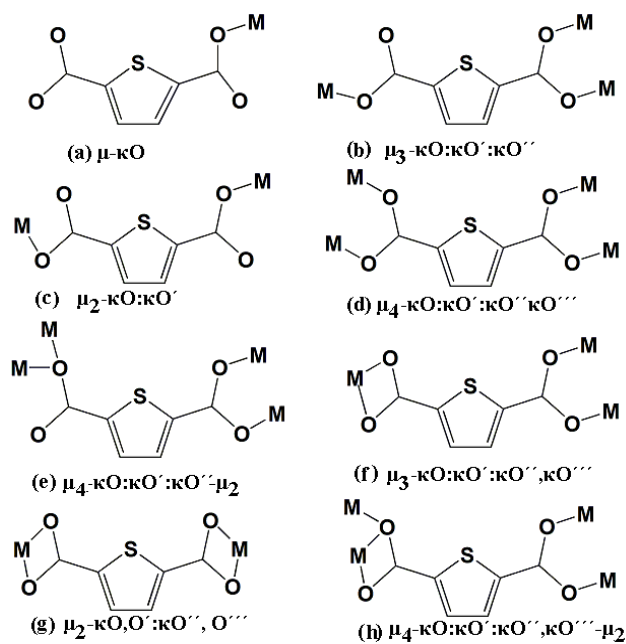

Scheme S1 various coordination modes of Tda<sup>2-</sup> in its metal complex.

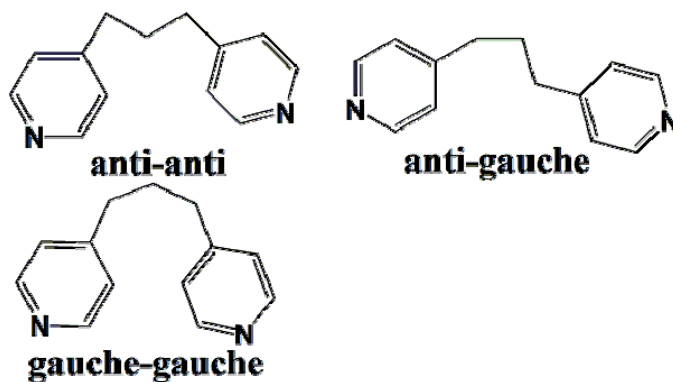

Scheme S2 three coordination configurations of bpp.

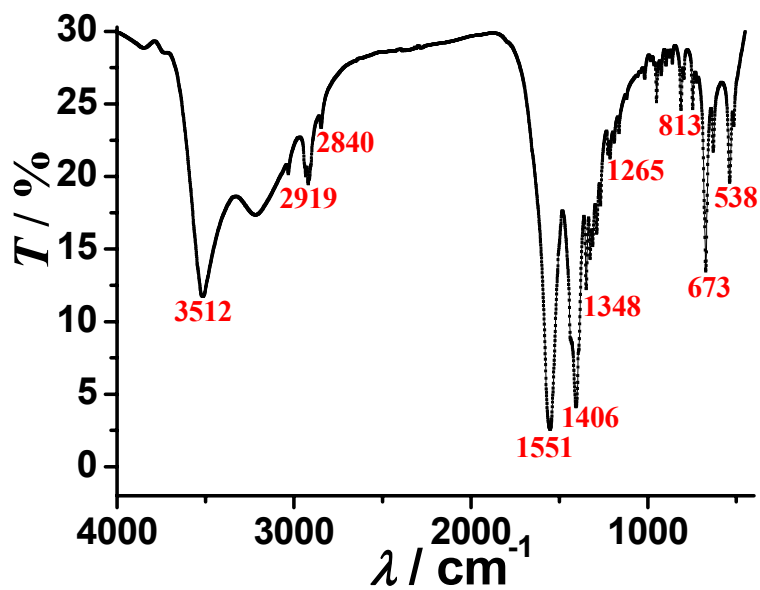

Fig. S1 the IR spectra of compound 1.

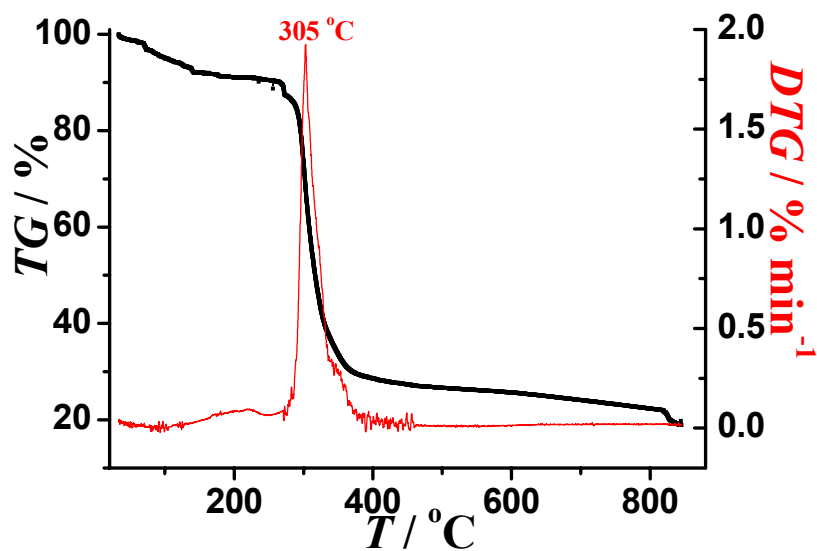

Fig. S2 The TG and DTG curves of compound 1.

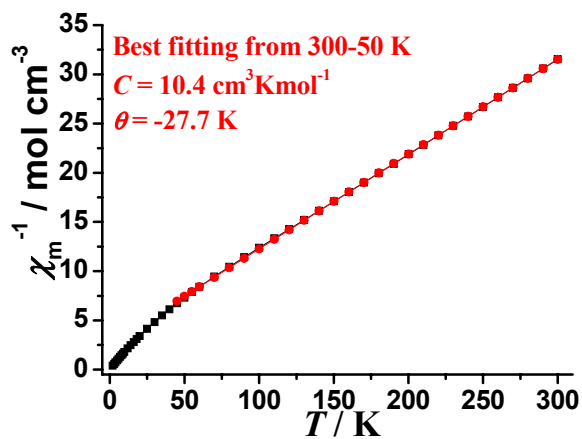

Fig. S3  $\chi_m^{-1}$  vs  $T$  for 1, the red line represents the best fit from 50-300 K.

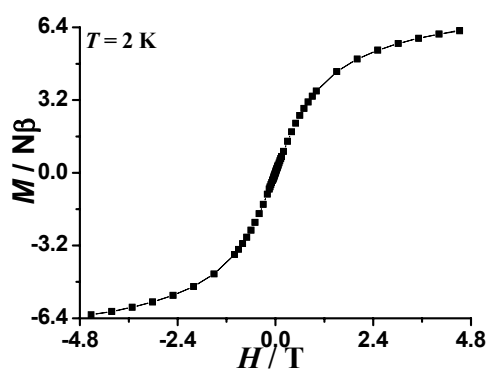

Fig. S4 hysteresis loop at 2 K.

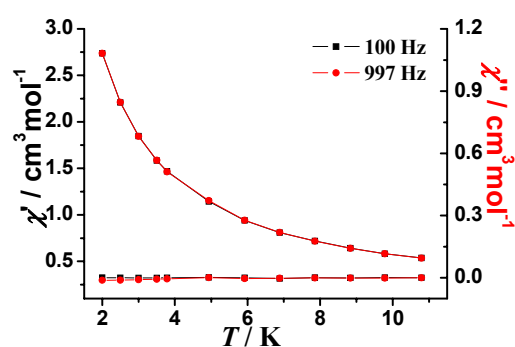

Fig. S5. AC magnetic measurements for **1** at  $H_{ac} = 2.5$  Oe and  $H_{dc} = 0$  Oe.

Table S1. Selected bond lengths (Å) and angles (°) for **1**.

| Selected bond (Å)   |          |             |          |
|---------------------|----------|-------------|----------|
| Co1-O1              | 2.069(5) | Co2-O2      | 2.047(6) |
| Co1-O1a             | 2.069(5) | Co2-O4      | 2.056(6) |
| Co1-O3              | 2.054(5) | Co2-O5g     | 2.160(4) |
| Co1-O3a             | 2.054(5) | Co2-O6g     | 2.235(5) |
| Co1-O5e             | 2.161(4) | Co2-N1      | 2.112(6) |
| Co1-O5g             | 2.161(4) | Co2-N2c     | 2.164(7) |
| Selected angles (°) |          |             |          |
| O1-Co1-O3           | 92.5(2)  | O2-Co2-O4   | 90.7(2)  |
| O1-Co1-O1a          | 87.6(2)  | O2-Co2-N1   | 92.5(2)  |
| O1-Co1-O3a          | 174.5(2) | O2-Co2-N2c  | 86.4(2)  |
| O1-Co1-O5e          | 84.3(2)  | O2-Co2-O5g  | 103.3(2) |
| O1-Co1-O5g          | 89.9(2)  | O2-Co2-O6g  | 162.7(2) |
| O1a-Co1-O3          | 174.5(2) | O4-Co2-N1   | 84.8(2)  |
| O1a-Co1-O3a         | 92.5(2)  | O4-Co2-N2c  | 177.1(2) |
| O1a-Co1-O5e         | 89.9(2)  | O4-Co2-O5g  | 92.4(2)  |
| O1a-Co1-O5g         | 84.3(2)  | O4-Co2-O6g  | 95.2(2)  |
| O3-Co1-O3a          | 87.8(2)  | O5g-Co2-O6g | 60.3(2)  |

---

|             |          |             |          |
|-------------|----------|-------------|----------|
| O3-Co1-O5e  | 95.6(2)  | O5g-Co2-N1  | 164.0(2) |
| O3-Co1-O5g  | 90.2(2)  | O5g-Co2-N2c | 88.1(2)  |
| O3a-Co1-O5e | 90.2(2)  | O6g-Co2-N1  | 104.2(2) |
| O3a-Co1-O5g | 95.6(2)  | O6g-Co2-N2c | 87.5(2)  |
| O5e-Co1-O5g | 172.0(2) | N1-Co2-N2c  | 95.5(2)  |

---

Symmetry code: a = 3/2-x, 1-y, z; c = 1/2+x, 2-y, 3/2-z; e = 1-x, 1-y, 1-z; g = 1/2+x, y, 1-z.
